# Supplementary material
Source: Royal Society of Chemistry journal article supplement (doi:10.1039/d5ta10332k)
Supplement: d5ta10332k1.pdf [file d5ta10332k1.pdf]

## Supporting Information

### Supercapacitor-Based CO<sub>2</sub> Capture Enhanced by Electrolyte pH Control

Selina E. Wiesner<sup>1,2</sup>, Zeke Coady<sup>2</sup>, Zhen Xu<sup>3</sup>, Malina Seyffertitz<sup>2</sup>, and Alexander C. Forse<sup>2</sup>

<sup>1</sup> Faculty of Chemistry and Pharmacy, Ludwig-Maximilians-Universität München, Munich 81377, Germany.

<sup>2</sup> Yusuf Hamied Department of Chemistry, University of Cambridge, Cambridge CB2 1EW, United Kingdom.

<sup>3</sup> Department of Materials and Henry Royce Institute, University of Manchester, Oxford Rd, Manchester M13 9PL, United Kingdom

### SI Figures

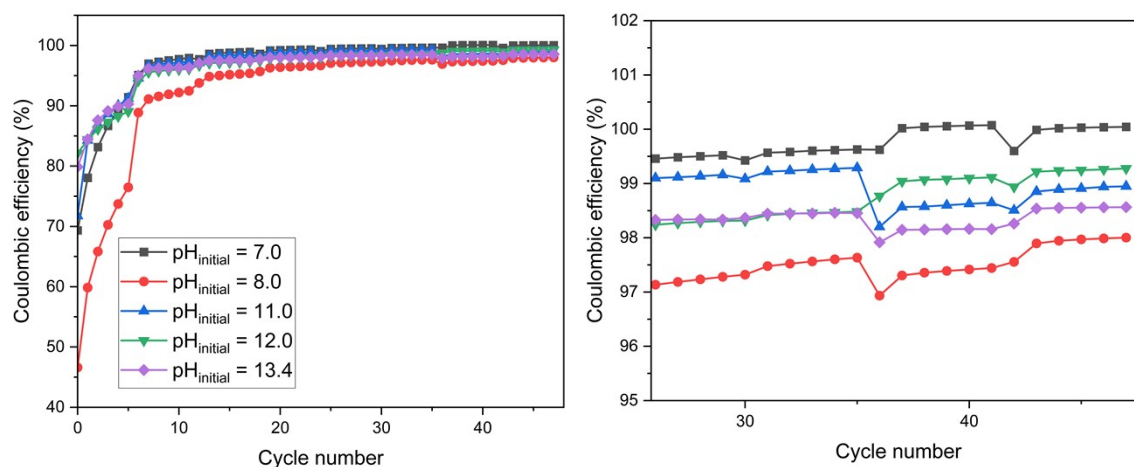

**Figure S1: Coulombic efficiencies (CE, %) for 1 M Na<sub>2</sub>SO<sub>4</sub> electrolytes with different pH<sub>initial</sub>.** **a)** CEs calculated as Discharge/ Charge capacity. **b)** Zoom in on CEs for higher cycle numbers. The low Coulombic efficiencies at low cycle numbers is explained by insufficient activation of the carbon electrolyte interface.

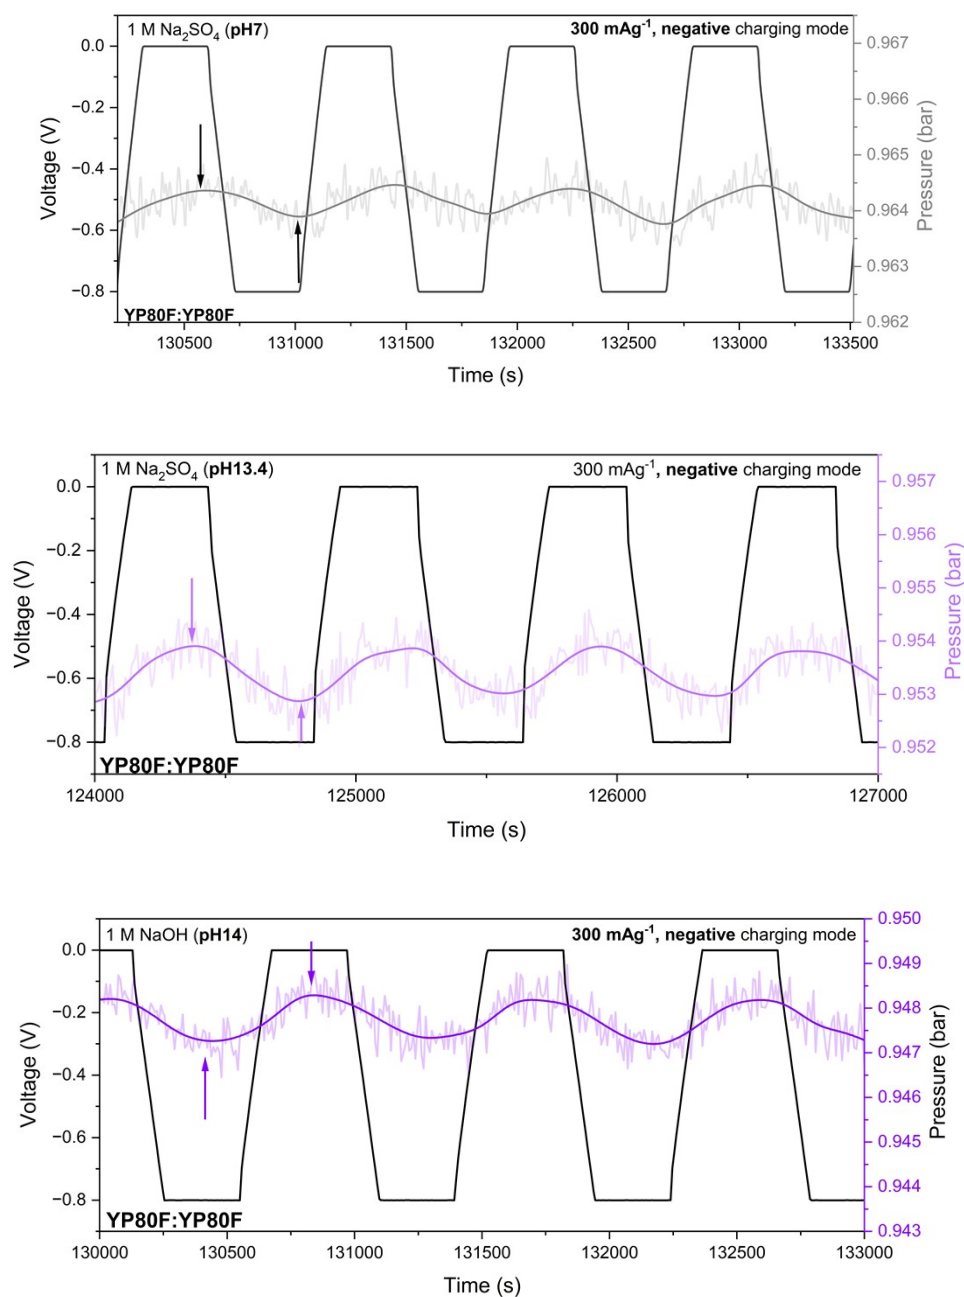

**Figure S2:** Pressure-voltage overview plots for the negative charging mode at 300 mA g<sup>-1</sup>. The pressure curves oscillate within a defined pressure range, and the lack of an irreversible increase in pressure during charging suggests the absence of parasitic side reactions.

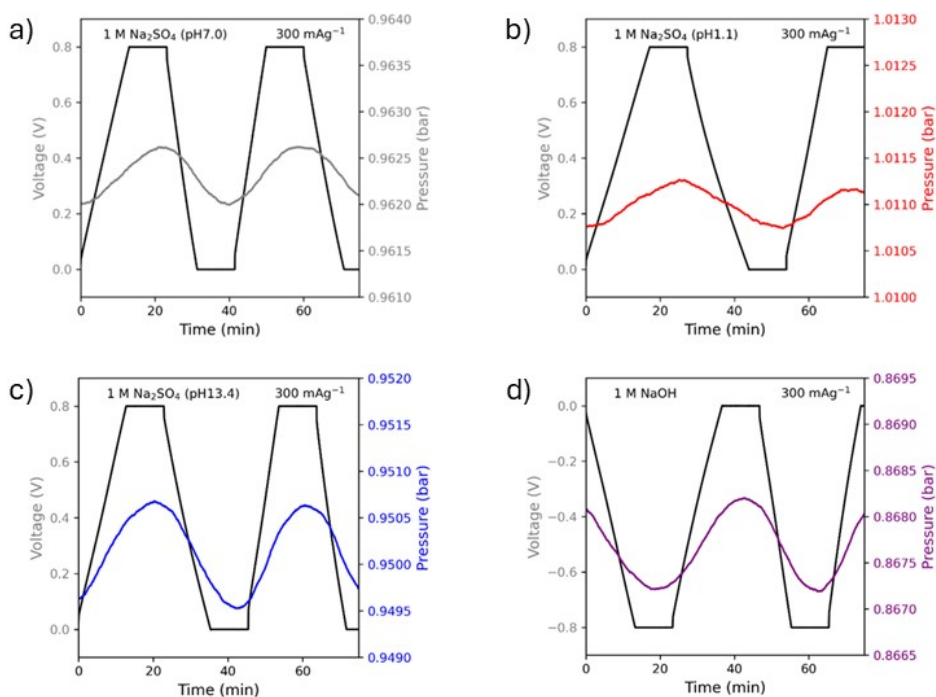

**Figure S3:** Pressure voltage curves for different electrolyte pH in the positive charging mode, for supercapacitor cells with YP80F electrodes, with pure  $\text{CO}_2$  gas the cell headspace. When the supercapacitor cells are charged positively,  $\text{CO}_2$  release is observed during charging (evidenced by the increase in pressure). All cells are charged to +0.8 V and are discharged after a 5-min voltage hold. **a)** Neutral (pH initial 7.0)  $\text{Na}_2\text{SO}_4$  electrolyte. **b)** Acidic (pH initial 1.1)  $\text{Na}_2\text{SO}_4$  electrolyte. **c)** Basic (pH initial 13.4)  $\text{Na}_2\text{SO}_4$  electrolyte. **d)** 1 M NaOH (pH initial 14.0).

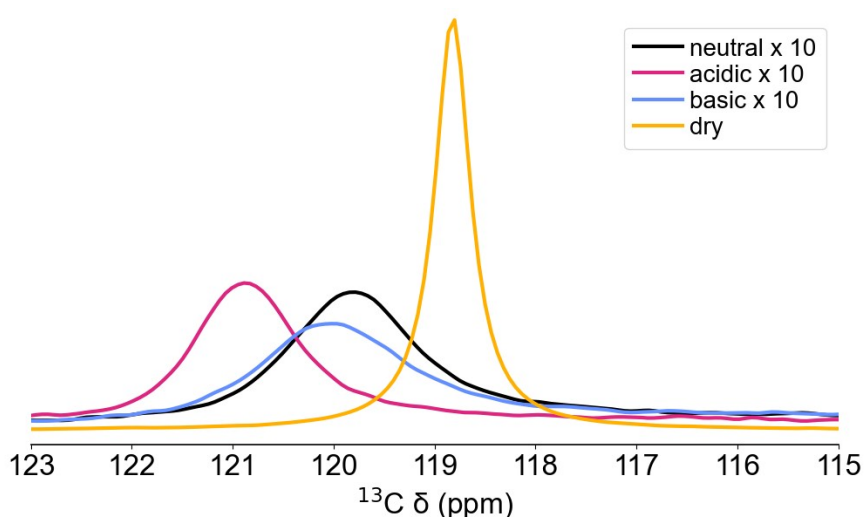

**Figure S4:** Comparison of the in-pore  $\text{CO}_2$  peak observed after  $^{13}\text{CO}_{2(g)}$  dosing in the  $^{13}\text{C}$  ss-NMR (9.4 T, 5 kHz MAS) spectra of the *neutral* electrolyte/electrode system (Figure 2e), the *acidic* electrolyte/electrode system (Figure 2f), the *basic* electrolyte/electrode system (Figure 2g), and a dry

YP80F electrode sample. In the dry electrode system, reflecting  $\text{CO}_{2(g)}$  uptake, this peak possesses a notably different chemical shift, linewidth, and peak integration than the electrolyte/electrode systems, reflecting the change in phase between these systems.

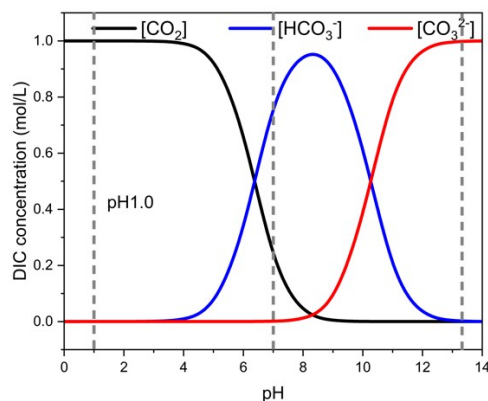

**Figure S5:** Bjerrum Plot showing the theoretical speciation of  $\text{CO}_2$ -derived species for pure water depending on pH (without activated carbon present). Plot derived with equilibrium constants from Millero et al.<sup>1</sup>

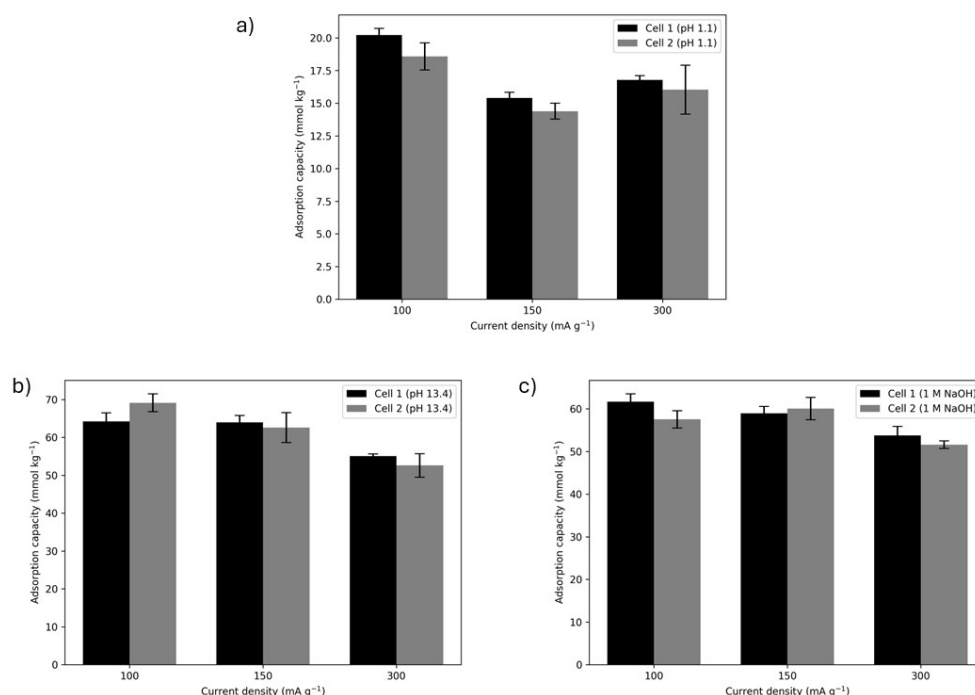

**Figure S6:** Reproducibility of adsorption capacities for coin cells. Two individual coin cell type supercapacitors (Cell A and Cell B) were assembled on different days by the same researcher and measured in two different gas cells (**Figure 2a**, main text) to ensure reproducibility. The deviations between Cell A and Cell B are within the error bar (calculated for 5 repetitions measured for the individual coin cell) a) Acidic  $\text{Na}_2\text{SO}_4$  (pH initial 1.1) electrolyte b) basic  $\text{Na}_2\text{SO}_4$  (pH initial 13.4) electrolyte c) 1 M NaOH electrolyte.

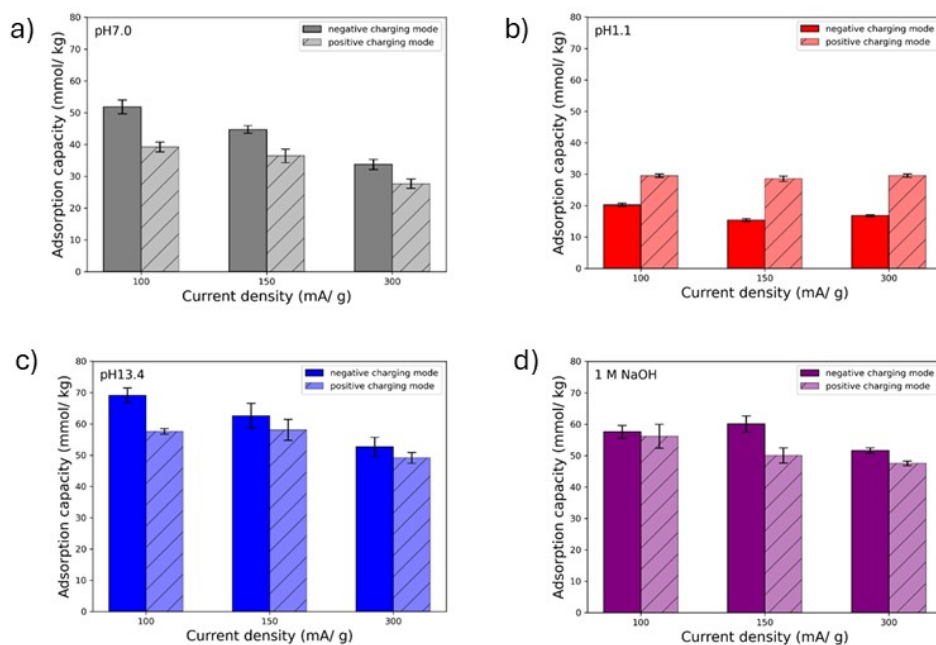

**Figure S7:** Comparison of CO<sub>2</sub> adsorption capacities (mmol/ kg) in the negative and positive charging mode for different pH electrolytes. **a)** Neutral (pH initial 7.0) Na<sub>2</sub>SO<sub>4</sub> electrolyte. **b)** Acidic (pH initial 1.1) Na<sub>2</sub>SO<sub>4</sub> electrolyte. **c)** Basic (pH initial 13.4) Na<sub>2</sub>SO<sub>4</sub> electrolyte. **d)** 1 M NaOH (pH initial 14.0).

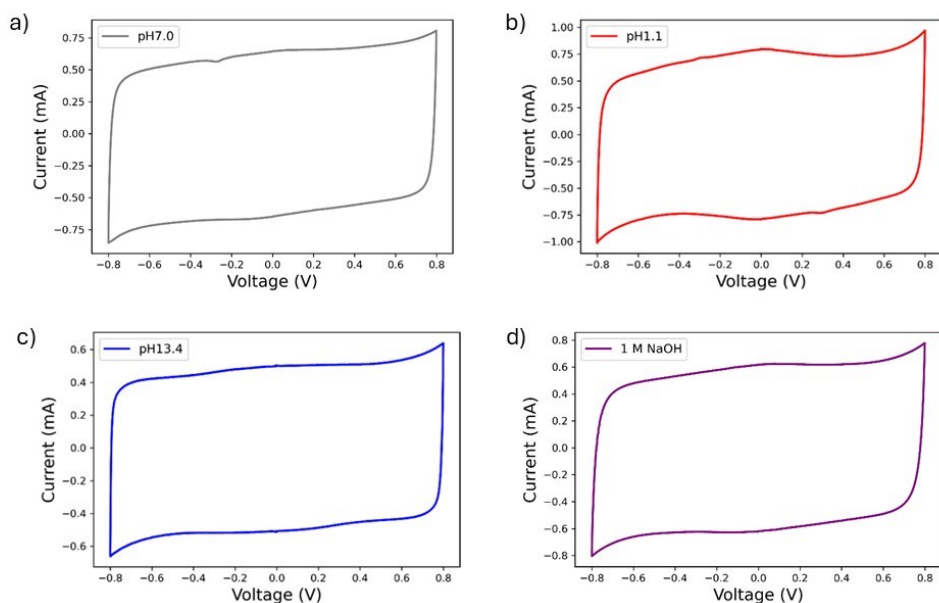

**Figure S8:** Cyclic voltammetry curves measured under  $\text{CO}_2$  atmosphere for different electrolyte pH. **a)** Neutral (pH initial 7.0)  $\text{Na}_2\text{SO}_4$  electrolyte. **b)** Acidic (pH initial 1.1)  $\text{Na}_2\text{SO}_4$  electrolyte. **c)** Basic (pH initial 13.4)  $\text{Na}_2\text{SO}_4$  electrolyte. **d)** 1 M NaOH (pH initial 14.0).

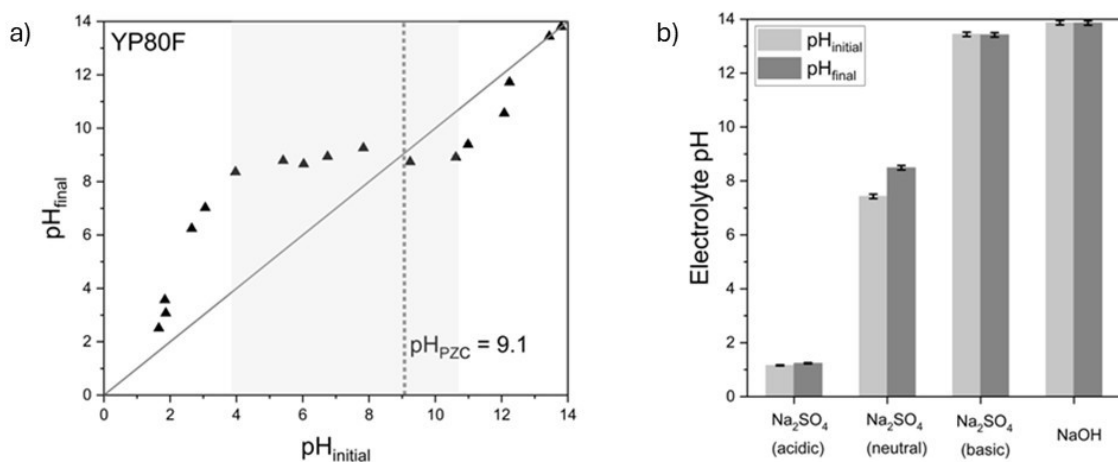

**Figure S9:** Interaction of carbon electrode (YP80F) with the electrolyte. **a)** Point of zero charge (PZC) of YP80F thin film measured under air after 24h equilibration time. PZC was determined using  $\text{Na}_2\text{SO}_4$  electrolyte with the pH adjusted using NaOH for the basic range and  $\text{H}_2\text{SO}_4$  for the acidic range of the pH scale. The mass ratio between carbon and electrolyte is the same as that within meshed coin cells.  $\text{pH}_{\text{PZC}}(\text{YP80F}) = 9.1$ . **b)**  $\text{pH}_{\text{final}}$  measurements for the acidic, neutral, basic  $\text{Na}_2\text{SO}_4$  electrolyte and for the 1 M NaOH under air. Experiment was performed analogously to a) using YP80F thin film material and a pH-adjusted  $\text{Na}_2\text{SO}_4$  electrolyte. pH of acidic and basic electrolytes and NaOH is not significantly influenced by proton uptake from the electrolyte as  $\text{pH}_{\text{initial}}$  and  $\text{pH}_{\text{final}}$  do not deviate a lot from each other.

Table 1:  $\text{pH}_{\text{finals}}$  extracted from de-crimped coin cells.

| Electrolyte name             | Acidic $\text{Na}_2\text{SO}_4$ | Neutral $\text{Na}_2\text{SO}_4$ | Basic $\text{Na}_2\text{SO}_4$ | NaOH |
|------------------------------|---------------------------------|----------------------------------|--------------------------------|------|
| $\text{pH}_{\text{initial}}$ | 1.1                             | 7.0                              | 13.4                           | 14.0 |
| $\text{pH}_{\text{final}}$   | 1.3                             | 8.4                              | 9.6                            | 12.3 |

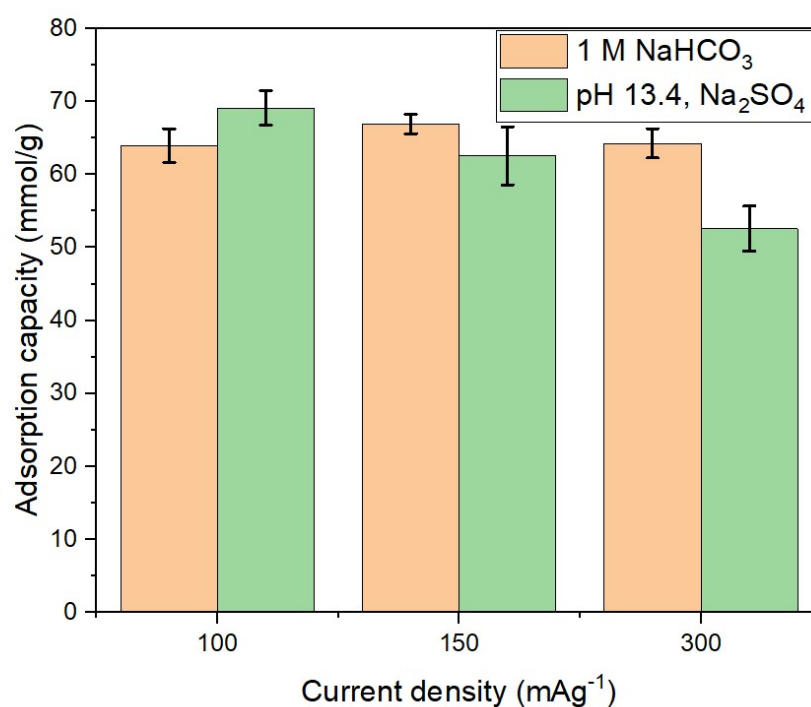

**S10:** Comparison of negative charging mode using 1 M  $\text{NaHCO}_3$  and using 1 M  $\text{Na}_2\text{SO}_4$  (pH 13.4) as an electrolyte.

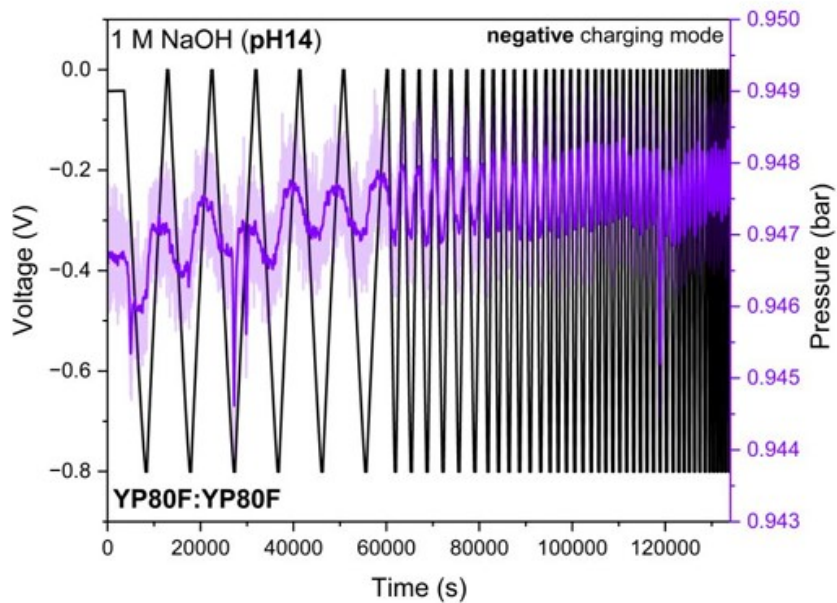

**S11:** Continuous pressure change in basic electrolyte attributed to corrosion with longer measurement times (36 h). Local spikes in pressure come from opening and closing of the incubator oven during the ongoing measurement.

## SI Calculations

### Electrochemical Gas Cell Calculations

#### Specific CO<sub>2</sub> adsorption capacities

For the calculation of the specific CO<sub>2</sub> adsorption capacity (CCO<sub>2</sub>, mmol kg<sup>-1</sup>) the amount of gas adsorbed was obtained from the difference in pressure using the ideal gas law in Equation 1:

$$n = \frac{pV}{RT} \quad (1)$$

with  $n$  the gas amount (mol),  $p$  pressure (Pa, 10<sup>-5</sup> bar),  $V$  volume (m<sup>3</sup>, 10<sup>6</sup> mL),  $T$  the temperature (K) and  $R$  the ideal gas constant ( $R = 8.31451 \text{ m}^3 \text{ Pa mol}^{-1} \text{ K}^{-1}$ ). To compensate for the slight irreversible decrease in the overall pressure curve arising from side reactions, an average of two maximum points is used as shown in Equation 2:

$$\Delta n = \frac{(n_{max1} + n_{max2})/2}{n_{min}} \quad (2)$$

where  $n_{max1}$  and  $n_{max2}$  represent the two maxima peaks of the gas amount adsorbed and  $n_{min}$  represents the minimum peak of the pressure curve.

The volume of the gas reservoir  $V_1$  (mol) in each gas cell was calculated prior to every gas adsorption measurement during a pressure test according to Boyle's Law (Equation 3).

$$p_1V_1 = p_2V_2 \quad (3)$$

For each individual gas cell, the volume in a section between two valves is known from calibration ( $A$  mL). For the dosing, the gas between two valves was removed first by applying a vacuum. The gas amount in the main gas reservoir is proportional to  $p_1V_1$ , where  $p_1$  is shown by the pressure sensor. After evacuation, CO<sub>2</sub> is dosed into the evacuated portion of the known volume ( $A$  mL). The total amount of gas remained the same, but as the pressure decreased to  $p_2$  (bar) the volume of the reservoir ( $V_1$ , mL) was calculated using Equation 4:

$$V_1 = \frac{p_2 A}{p_1 - p_2} \quad (4)$$

This step also fulfils as a leaking test to make sure that the coin cell was assembled tightly and that there is no leaking within the gas cell.

With Equation 5, the CO<sub>2</sub> adsorption capacity  $C_{CO_2}$  (mmol kg<sup>-1</sup>) which is normalized to the active mass of the electrodes are calculated. The errors of the overall adsorption capacities were calculated using a 95% confidence interval with the Students t-test.

$$C_{CO_2} = \frac{\Delta n}{m} \times 10^6 \quad (5)$$

### Adsorption rates

The CO<sub>2</sub> adsorption rates ( $R_{CO_2}$ , mmol<sub>CO<sub>2</sub></sub> kg<sup>-1</sup> h<sup>-1</sup>) were calculated using Equation 6:

$$R_{CO_2} = \frac{C_{CO_2}}{t_{charging}/3600} \quad (6)$$

where  $C_{CO_2}$  is the measured CO<sub>2</sub> adsorption capacity and  $t_{charging}$  corresponds to the total charging time (including the voltage hold step).

### Gravimetric capacitance

The specific discharge capacitance values ( $C_{electrode}$ , F g<sup>-1</sup>) of the working electrodes were calculated from the GCD data according to Equation 7:

$$C_{electrode} = 2 \frac{I \Delta t}{m \Delta U} \quad (7)$$

with  $C_{electrode}$  (F g<sup>-1</sup>) as the specific discharge capacitance of the working electrode,  $I$  (A) as the constant discharge current,  $\Delta U$  (V) as the cell voltage,  $m$  (g) as the mass of the active electrode material (95% of the absolute electrode mass) and  $\Delta t$  (s) as the charge/ discharge time.

The cell voltage  $\Delta U$  (V) is calculated from the discharge curve of the GCD data using Equation 8:

$$\Delta U = U_{max} - IR_{drop} - U_{min} \quad (8)$$



### Quantitative ss-NMR Calculations

Measurements were performed under quantitative conditions for the  $\text{CO}_2$  and  $\text{HCO}_3^-$  peaks, with  $D_1$  delay times set to  $> 5 * T_1$  for each of these peaks, with  $T_1$  measured by inversion recovery experiments.

The spectra also include contributions from  $^{13}\text{C}$  in the unenriched activated carbon. A broad background peak is observed centred at approximately 120 ppm, along with a spinning sideband at approximately 170 ppm. These were assigned based on  $^{13}\text{C}$  measurements of the dry activated carbon (Figure S8) in alignment with literature measurements.<sup>2-4</sup>

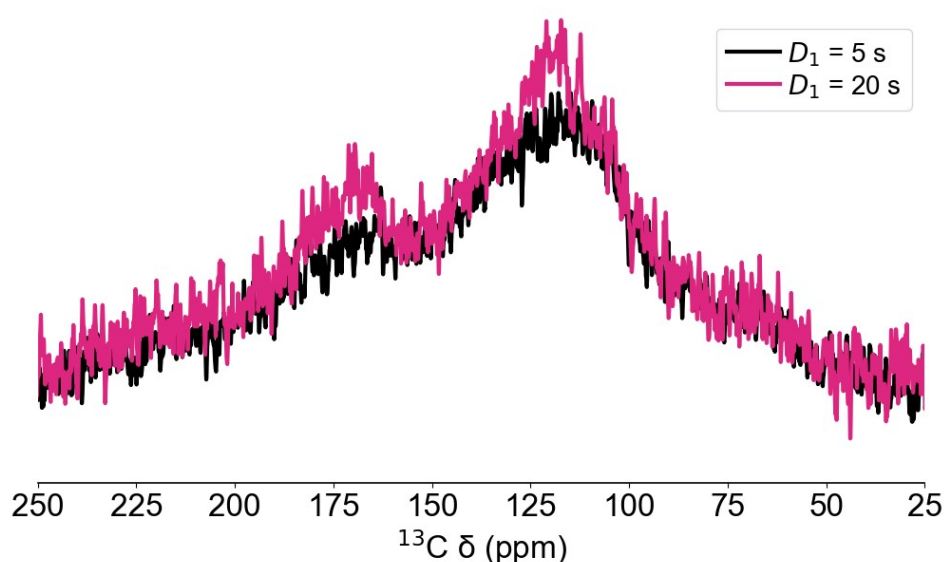

**Figure S12:**  $^{13}\text{C}$  NMR of dry, undosed YP80F film, measured with  $D_1$  delay times of 5 s (as was used for the NMR experiments on dosed samples in Figures 2 and 4) and 20 s (to better display the peaks at 120 and 170 ppm).

The contribution of these background resonances to the integrations of the  $^{13}\text{CO}_2$ -dosed systems was removed by subtraction of a  $^{13}\text{C}$  spectrum of the undosed YP80F film after processing. The spectrum of the undosed YP80F film was scaled to the mass of the carbon and the number of scans of the original system, and was recorded with an identical  $D_1$  to the measurements of the  $^{13}\text{CO}_2$ -dosed systems.

In order to relate the peak integration of our quantitative NMR experiments ( $I_{\text{CO}_2}$  and  $I_{\text{HCO}_3^-}$ ) to the initial gravimetric uptake of  $\text{CO}_2$  and  $\text{HCO}_3^-$  ( $C_{\text{CO}_2}^{\text{in}}$  and  $C_{\text{HCO}_3^-}^{\text{in}}$ ), NMR integrations were

referenced to CO<sub>2</sub> uptake in dry activated carbon. This was performed following an identical procedure as the one described previously.<sup>5</sup>  $C^{in}$  values were then calculated using Equation 9:

$$C^{in} = \frac{I}{10^{11}} \times a + b \quad (9)$$

$a$  relates integration to moles of CO<sub>2</sub>, and a value of 0.4361 mmol g<sup>-1</sup> was calculated from calibration.  $b$  was included to account for remaining baseline distortion after background correction, and a value of 0.01995 mmol g<sup>-1</sup> was calculated from calibration. Using this referencing process corrects for potential signal attenuation caused by the skin depth effect.<sup>6-8</sup>

## References

- (1) Millero, F. J.; Graham, T. B.; Huang, F.; Bustos-Serrano, H.; Pierrot, D. Dissociation Constants of Carbonic Acid in Seawater as a Function of Salinity and Temperature. *Mar. Chem.* **2006**, *100* (1–2), 80–94. <https://doi.org/10.1016/j.marchem.2005.12.001>.
- (2) Puziy, A. M.; Poddubnaya, O. I.; Socha, R. P.; Gurgul, J.; Wisniewski, M. XPS and NMR Studies of Phosphoric Acid Activated Carbons. *Carbon* **2008**, *46* (15), 2113–2123. <https://doi.org/10.1016/j.carbon.2008.09.010>.
- (3) Freitas, J. C. C.; Emmerich, F. G.; Cernicchiaro, G. R. C.; Sampaio, L. C.; Bonagamba, T. J. Magnetic Susceptibility Effects on <sup>13</sup>C MAS NMR Spectra of Carbon Materials and Graphite. *Solid State Nucl. Magn. Reson.* **2001**, *20* (1–2), 61–73. <https://doi.org/10.1006/snmr.2001.0030>.
- (4) Freitas, J. C. C.; Bonagamba, T. J.; Emmerich, F. G. Investigation of Biomass- and Polymer-Based Carbon Materials Using <sup>13</sup>C High-Resolution Solid-State NMR. *Carbon* **2001**, *39* (4), 535–545. [https://doi.org/10.1016/S0008-6223\(00\)00169-X](https://doi.org/10.1016/S0008-6223(00)00169-X).
- (5) Coady, Z.; Brookes, S.; Shen, Z.; Rhodes, B.; Mapstone, G.; Xu, Z.; Yu, W.; Nishihara, H.; Schran, C.; Michaelides, A.; Forse, A. Unexpected Oversolubility of CO<sub>2</sub> Measured at Electrode-Electrolyte Interfaces. ChemRxiv June 12, 2025. <https://doi.org/10.26434/chemrxiv-2025-r7jr6>.
- (6) Mincey, D. W.; Popovich, M. J.; Faustino, P. J.; Hurst, M. M.; Caruso, J. A. Monitoring of Electrochemical Reactions by Nuclear Magnetic Resonance Spectrometry. *Anal. Chem.* **1990**, *62* (11), 1197–1200. <https://doi.org/10.1021/ac00210a020>.
- (7) Bhattacharyya, R.; Key, B.; Chen, H.; Best, A. S.; Hollenkamp, A. F.; Grey, C. P. In Situ NMR Observation of the Formation of Metallic Lithium Microstructures in Lithium Batteries. *Nat. Mater.* **2010**, *9* (6), 504–510. <https://doi.org/10.1038/nmat2764>.
- (8) Ilott, A. J.; Chandrashekar, S.; Klöckner, A.; Chang, H. J.; Trease, N. M.; Grey, C. P.; Greengard, L.; Jerschow, A. Visualizing Skin Effects in Conductors with MRI: (7)Li MRI Experiments and Calculations. *J. Magn. Reson. San Diego Calif 1997* **2014**, *245*, 143–149. <https://doi.org/10.1016/j.jmr.2014.06.013>.
